# Supplementary material
Source: publisher site journal article supplement (https://www.spandidos-publications.com/2204/downloadSupplementary)
Supplement: Supplementary file 1 [file downloadSupplementary]

## Sheet: 127 Cell Lines
Table SI. Compilation of 127 Uterine Cancer Cell Lines; updated to May 1, 2020.
Cell Line ID	Cell Line Name	Histology	Pt Age	Country of Origin1	Availability2	TP533	Mutation	p53	Ref.
CL01	AC-258	Adenocarcinoma	55	United States					Gal, et al (1982)
CL02	ACI-45	MMMT	64	United States	Contact ACI4				Nagendra, et al (2012)
CL03	ACI-52	Adenocarcinoma	50	United States	Contact ACI4				Nagendra, et al (2012)
CL04	ACI-61	Adenocarcinoma	60	United States	Contact ACI4				Nagendra, et al (2012)
CL05	ACI-68	Adenocarcinoma	74	United States	Contact ACI4				Nagendra, et al (2012)
CL06	ACI-70	MMMT	84	United States	Contact ACI4				Nagendra, et al (2012)
CL07	ACI-80	Adenocarcinoma	53	United States	Contact ACI4				Nagendra, et al (2012)
CL08	ACI-98	Undifferentiated	24	United States	Contact ACI4				Nagendra, et al (2012)
CL09	ACI-126	Serous	63	United States	Contact ACI4				Nagendra, et al (2012)
CL10	ACI-158	Serous	57	United States	Contact ACI4				Nagendra, et al (2012)
CL11	ACI-181	Adenocarcinoma	56	United States	Contact ACI4				Nagendra, et al (2012)
CL12	NCI-EC1	Adenocarcinoma	60	United States	Contact ACI4				Nagendra, et al (2012)
CL13	NCI-EC2	Clear cell	63	United States	Contact ACI4				Nagendra, et al (2012)
CL14	AN-3	Adenocarcinoma	55	United States	ATCC	MUT	638G>A	R213Q	Dawe, et al (1964)
CL15	AN3-CA	Adenocarcinoma	55	United States	DSMZ, ACCEGEN	MUT	1165G>T	G389W	Dawe, et al (1964)
CL16	CAC-1	Adenocarcinoma		United States					Carter and Madden (2000)
CL17	CI78-1	Adenosquamous	71	Australia					Bertoncello, et al (1985)
CL18	CS-99	Carcinosarcoma	79	Germany					Schulten, et al (2007)
CL19	COLO-684	Adenocarcinoma	63		ECACC, ACCEGEN				Unpublished
CL20	COLO-685	Adenocarcinoma	63		ECACC, ACCEGEN				Unpublished
CL21	CUME-1	Adenocarcinoma	58	South Korea					Kim, et al (1997)
CL22	EA-1	Adenocarcinoma	74	United States					Boyd, et al. (1990)
CL23	EFE-184	Carcinoma	69		DSMZ	MUT	844C>T	R282W
CL24	EI	Adenocarcinoma	55	Japan					Yudate, et al (1995)
CL25	EJ	Adenocarcinoma	56	Japan					Isaka, et al (2002)
CL26	EMTOKA	Carcinosarcoma	64	Japan	JCRB				Gorai, et al (1983)
CL27	EN	Adenocarcinoma	50	Japan	DSMZ	MUT	817_818ins1	R273fs*	Isaka, et al (2003)
CL28	EN-1078D	Carcinoma	62	Canada					Dery, et al (2007)
CL29	ECC-1	Adenocarcinoma	68	United States		MUT	736A>G	M246V	Cell line identity debated
CL30	ESS-1	Mesodermal mixed tumor	76	United States	DSMZ	LOF	637C>T	R213 STOP	Fresia, et al (1992)
CL31	ETN-1	Adenosquamous	61	Netherlands					Kruitwagen, et al (1989)
CL32	FU-MMT-1	Carcinosarcoma	75	Japan					Emoto, et al (1992)
CL33	FU-MMT-2	Carcinosarcoma	61	Japan					Emoto, et al (1992)
CL34	HEC-1	Adenocarcinoma	71	Japan	ATCC, JCRB, ACCEGEN	GOF	743G>A	R248Q	Kuramoto (1972)
CL35	Hec-1-A	Adenocarcinoma	71	Japan	ATCC, JCRB	GOF	743G>A	R248Q	Kuramoto (1972)
CL36	Hec-1-B	Adenocarcinoma	71	Japan	ATCC, JCRB	GOF	743G>A	R248Q	Kuramoto (1972)
CL37	HEC-6	Adenocarcinoma with squamous metaplasia	48	Japan	JCRB, ACCEGEN	GOF	818G>A	R273H	Kuramoto, et al (1991)
CL38	HEC-6	Adenocarcinoma with squamous metaplasia	48	Japan	JCRB, ACCEGEN	WT			Kuramoto, et al (1991)
CL39	HEC-108	Adenocarcinoma		Japan	JCRB, ACCEGEN	MUT	452C>A	P151H	Kuramoto, et al (1991)
CL40	HEC-108	Adenocarcinoma		Japan	JCRB, ACCEGEN	WT			Kuramoto, et al (1991)
CL41	HEC-116	Adenocarcinoma		Japan	JCRB, ACCEGEN	GOF	743G>A	R248Q	Kuramoto, et al (1991)
CL42	HEC-151	Adenocarcinoma		Japan	JCRB, ACCEGEN	MUT	91G>A	V31I	Kuramoto, et al (1991)
CL43	HEC-155	Serous cystAdenocarcinoma (C56.9)	56	Japan	JCRB, ACCEGEN	MUT	864T>A	N288K	Kuramoto, et al (1991)
CL44	HEC-180	Serous cystAdenocarcinoma (C56.9)		Japan	JCRB, ACCEGEN	MUT	584T>A	I195N	Kuramoto, et al (1991)
CL45	HEC-251	Adenocarcinoma		Japan	JCRB, ACCEGEN	MUT	461G>A	G154D	Kuramoto, et al (1991)
CL46	HEC-265	Adenocarcinoma		Japan	JCRB, ACCEGEN	WT			Kuramoto, et al (1991)
CL47	HEC50co	Carcinoma,		Japan		LOF	651_672+20del42	del G187-E224	Dai, et al (2002)
CL48	HEC-59	Adenocarcinoma		Japan	JCRB, ACCEGEN	GOF	818G>A	R273H	Kuramoto, et al (1991)
CL49	HEC-88	Adenocarcinoma with squamous metaplasia		Japan	JCRB, ACCEGEN	WT			Kuramoto, et al (1991)
CL50	HES	Serous	67	Japan		WT			Hashimoto, et al (2008)
CL51	HHUA	Adenocarcinoma	54	Japan	RIKEN	MUT	413C>T	A138V	Ishiwata, et al (1984)
CL52	HHUABM	Adenocarcinoma	42	Japan					Kiguchi, et al (1999)
CL53	HOUA-1	Adenocarcinoma	55	Japan	RIKEN	MUT	844C>T	R282W	Ishiwata, et al (1989)
CL54	IK-90	Adenocarcinoma	39	Japan		MUT	736A>G	M246V	High passage no. Ishikawa cells
CL55	Ishikawa	Adenocarcinoma	39	Japan	ECACC	MUT	736A>G	M246V	Nishida, et al (1985)
CL56	juhcs1	carcinosarcoma	56	Japan	RIKEN				RIKEN RCB1547
CL57	jhuem1	Adenocarcinoma	56	Japan	RIKEN	WT			RIKEN RCB1548
CL58	jhuem2	Adenocarcinoma	62	Japan	RIKEN	WT			RIKEN RCB1551
CL59	jhuem3	Adenocarcinoma	60	Japan	RIKEN	LOF	499C>T	Q167 STOP	RIKEN RCB1552
CL60	jhuem7	Adenocarcinoma	58	Japan	RIKEN	WT			RIKEN RCB1677
CL61	jhuem14	Adenocarcinoma		Japan	RIKEN				RIKEN RCB2225
CL62	KCC-1a,b	Adenocarcinoma	67	Japan					Katoaka, et al (1991)
CL63	KKNS-1	Adenocarcinoma	57	Japan					Misawa (1988)
CL64	KKNS-2	Adenocarcinoma	57	Japan					Misawa (1988)
CL65	KKNS-3	Adenocarcinoma	57	japan					Misawa (1988)
CL66	KLE	Adenocarcinoma	64	United States	ATCC, ACCEGEN	GOF	524G>A	R175H	Richardson, et al (1984)
CL67	LHY-821	Adenocarcinoma	50	China					Hu, et al (2012)
CL68	MaMi	Stromal Sarcoma	65	Japan					Nasu, et al (1998)
CL69	MFE-280	Adenocarcinoma	77	Germany	ECACC,DSMZ	MUT	919+1G>C	SPLICE	Hackenberg, et al (1998)
CL70	MFE-296	Adenocarcinoma	68	Germany	ECACC,DSMZ	LOF	916C>T	R306 STOP	Hackenberg, et al (1998)
CL71	MFE-319	Adenosquamous	81	Germany	DSMZ	GOF	659A>G	Y220C	Hackenberg, et al (1998)
CL72	MFE-319	Adenosquamous	81	Germany	DSMZ	GOF	817C>T	R273C	Hackenberg, et al (1998)
CL73	NOU-1	Adenocarcinoma	52	United States					Faruqi, et al (2002)
CL74	NUE-1	Adenocarcinoma	62	Japan					Yasui (1987)
CL75	Nur-1	Adenocarcinoma	61	Japan					Ohyama, et al (2015)
CL76	OMC-2	Adenocarcinoma	59	Japan	RIKEN				Yamada, et al (1989)
CL77	OMC-6	Stromal Sarcoma	41	Japan					Ueda, et al (1988)
CL78	OMC-9	Stromal Sarcoma	55	Japan	RIKEN				Kakuno, et al (2008)
CL79	RL95-2	Adenosquamous	65	United States	ATCC, ACCEGEN	MUT	652_653del2	del V218	Way, et al (1983)
CL80	Sawano	Adenocarcinoma	61	Japan	RIKEN				Satoh, et al (1995)
CL81	SCRC-1	Adenocarcinoma	47	United States					Gorodecki, et al (1979)
CL82	SK-UT-1b	Leiomyosarcoma	75	United States	ATCC, ACCEGEN	WT			Chen (1988)
CL83	SK-UT-2	Adenocarcinoma	49	United States					Rubin, et al (1992)
CL84	SKN	Leiomyosarcoma	52	Japan	RIKEN, ACCEGEN				Ishiwata, et al (1977)
CL85	SNG-M	Lymph node met	52	Japan	JCRB	WT			Ishiwata, et al (1977)
CL86	SNG-P	Adenocarcinoma	52	Japan	JCRB				Ishiwata, et al (1977)
CL87	SNU-539	MMMT	53	Korea	ACCEGEN	MUT		N239E	Yuan, et al (1997)
CL88	SNU-685	MMMT	70	Korea	ACCEGEN	MUT	919+1G>T	SPLICE	Ku and Park (2005)
CL89	SNU-1077	MMMT	60	Korea	ACCEGEN	MUT	584T>G	I195S	Ku and Park (2005)
CL90	SPAC-1-L	Papillary serous	55	Japan					Hirai, et al (1994)
CL91	SPAC-1-S	Papillary serous	55	Japan					Hirai, et al (1994)
CL92	SPEC-1	Papillary serous	57	United States					Boyd, et al (1989)
CL93	SPEC-2	Papillary serous	57	United States					Boyd, et al (1989)
CL94	TEN	Clear cell	74	Japan		LOF	1024C>T	R342 STOP	Fushiki, et al (1997)
CL95	TMCC-2	Clear cell		Japan					Iwabuchi, et al (1991)
CL96	TU-ECS-1	Carcinosarcoma	66	Japan		MUT		A189V; R273C	Chiba, et al (2017)
CL97	ASPC-ARK-1	Papillary serous*	62	United States					Varughese, et al (2011)
CL98	ASPC-ARK-2	Papillary serous*	63	United States					Varughese, et al (2011)
CL99	ASPC-ARK-3	Papillary serous*	59	United States					Varughese, et al (2011)
CL100	ASPC-ARK-4	Papillary serous	73	United States					Varughese, et al (2011)
CL101	ASPC-ARK-5	Papillary serous*	73	United States					Varughese, et al (2011)
CL102	ASPC-ARK-6	Papillary serous	62	United States					Varughese, et al (2011)
CL103	ASPC-ARK-7	Papillary serous	75	United States					English, et al (2013)
CL104	ASPC-ARK-8	Papillary serous	88	United States					English, et al (2013)
CL105	ASPC-ARK-9	Papillary serous*	73	United States					English, et al (2013)
CL106	ASPC-ARK-10	Papillary serous	79	United States					English, et al (2013)
CL107	ASPC-ARK-11	Papillary serous*	80	United States					English, et al (2013)
CL108	ASPC-ARK-12	Papillary serous*	80	United States					English, et al (2013)
CL109	ASPC-ARK-13	Papillary serous	67	United States					English, et al (2013)
CL110	ASPC-ARK-14	Papillary serous*	73	United States					English, et al (2013)
CL111	ASPC-ARK-15	Papillary serous	67	United States					English, et al (2013)
CL112	ASPC-ARK-16	Papillary serous	65	United States					English, et al (2013)
CL113	ASPC-ARK-17	Papillary serous	59	United States					English, et al (2013)
CL114	ASPC-ARK-18	Papillary serous*	62	United States					English, et al (2013)
CL115	ASPC-ARK-19	Papillary serous	65	United States					English, et al (2013)
CL116	ASPC-ARK-20	Papillary serous	42	United States					English, et al (2013)
CL117	ASPC-ARK-21	Papillary serous	70	United States					English, et al (2013)
CL118	ASPC-ARK-22	Papillary serous	60	United States					English, et al (2013)
CL119	UM-EC-1	Adenocarcinoma	66	United States	UKN	WT			Grenman, et al (1988)
CL120	UM-EC-2	Adenocarcinoma	53	United States	UKN	WT			Grenman, et al (1988)
CL121	UM-EC-3	Adenocarcinoma		United States	UKN	WT			Rantanen, et al (1992)
CL122	UT-EC-1	Adenocarcinoma	70	Finland	UKN	WT			Rantanen, et al (1994)
CL123	UT-EC-2A	Adenocarcinoma	44	Finland	UKN	WT			Rantanen, et al (1995)
CL124	UT-EC-2B	Adenocarcinoma	44	Finland	UKN	WT			Rantanen, et al (1995)
CL125	UT-EC-3	Adenocarcinoma	68	Finland	UKN	WT			Rantanen, et al (1994)
CL126	Watanabe	Adenocarcinoma	58	Japan	RIKEN				Satoh, et al (1995)
CL127	ZJB-ENC1	Adenocarcinoma	58	China					Liu, et al (2019)
1As near as can be determined from the literature
2Cells can be purchased directly pending proper paperwork and/or licensure; ATCC = American Type Culture Collection, DSMZ = Deutsche Sammlung von Mikroorganismen und Zellkulturen,
ECACC = European Collection of Authenticated Cell Cultures, JCRB = Japanese Collection of Research Biorecources, RIKEN = Institute of Physical and Chemical Research,
ACCEGEN = AcceGen Biotechnology
3 TP53 mutation status is only provided if reported in the IARC Database, Cellosaurus or in a publication
4Anderson Cancer Institute
*Patient ethnicity is identified in the publication as African American
The data presented are, to the extent possible, derived from the original publications. We do not claim that this list is exhuastive and, of course, any omissions or errors are soley our own.

## Sheet: References
References
1	Boyd JA, Siegal GP, Kaufman DG 1989 Establishment and characterization of a human cell line from a serous papillary endometrial carcinoma. Gynecologic Oncology 33: 301-312.
2	Chen TR 1988 SK-UT-1B, a human tumorigenic diploid cell line. Cancer Genetics and Cytogenetics 33: 77-81.
3	Chiba Y, Sato S, Itamochi H, Suga Y, Fukagawa T, Oumi N, Oishi T, Harada T, Sugai T, Sugiyama T 2017 Establishment and characterization of a novel uterine carcinosarcoma cell line, TU-ECS-1, with mutations of TP53 and KRAS. Human Cell 30: 140-148.
4	Dai D, Wolf DM, Litman ES, White MJ, Leslie KK 2002 Progesterone inhibits human endometrial cancer cell growth and invasiveness: Down-regulation of cellular adhesion molecules through progesterone B receptors. Cancer Research 62: 881-886.
5	Dawe CJ, Banfield WG, Morgan WD, Slatick MS, Curth HO 1964 Growth in continuous culture, and in hamsters, of cells from a neoplasia associated with anncanthosis nigricans. Journal of the National Cancer Institue 33: 441-456.
6	Emoto M, Iwasaki H, Kikuchi M, Ishiguro M, Kubota T, Izumi H, Shirakawa K, Kaneko Y 1992 Two cell lines established from mixed Mullerian tumors of the uterus. Cancer 69: 1759-1768.
7	English DP, Bellone S, Cocco E, Bortolomai I, Pecorelli S, Lopez S, Silasi D-A, Schwartz PE, Rutherford T, Santin AD 2013 Oncogenic PIK3CA gene mutations and HER2/neu gene amplifications determine sensitivity of uterine serous carcinoma cell lines to GDC-0980, a selective inhibitor of Class I PI3 kinase and mTOR kinase (TORC1/2). American Journal of Obstetrics and Gynecology 209: 465.e1-9.
8	Fresia AE, Currie JL, Farrington JE, Laxman R, Griffin CA 1992 Uterine stromal sarcoma cell line: A cytogenetic and electron microscopic study. Cancer Genetics and Cytogenetics 60: 60-66.
9	Gorodecki J, Mortel R, Ladda RL, Ward SP, Geder L, Rapp F 1979 Establishment and characterization of a new endometrial cancer cell line (SCRC-1). American Journal of Obstetrics and Gynecology 135: 671-679.
10	Grenman SE, Van Dyke DL, Worsham MJ, del Rosario F, Roberts JA, McClatchey KD, Schwartz DR, Babu VR, Carey TE 1988 UM-EC-1, A new hypodiploid human cell line derived from a poorly differentiated endometrial cancer. Cancer Research 48: 1864-1873.
11	Grenman SE, Worsham MJ, van Dyke DL, England B, McClatchey KD, Babu VR, Roberts JA, Mäenpää J, Carey TE 1990 Establishment and characterization of UM-EC-2, a tamoxifen-sensitive, estrogen receptor-negative human endometrial carcinoma cell line. Gynecologic Oncology 37: 188-199.
12	Hackenberg R, Beck S, Filmer A, Hushmand Nia A, Kunzmann R, Koch M, Slater EP, Schultz K-D 1994 Androgen responsiveness of the new human endometrial cancer cell line MFE-296. International Journal of Cancer 57: 117-122.
13	Hackenberg R, Hawighorst T, Hild F, Schultz K-D 1997 Establishment of new epithelial carinoma cell lines by blocking monolayer formation. Journal of Cancer Research and Clinical Oncology 123: 669-673.
14	Isaka K, Nishi H, Sagawa Y, Nakada T, Osakabe Y, Serizawa H, Ebihara Y, Takayama M 2003 Establishment of a new human cell line (EN) with TP53 mutation derived from endometrial carcinoma. Cancer Genetics and Cytogenetics 141: 20-25.
15	Ishiwata I, Nozawa S, Nagai S, Kurihara, Mikata A, Okumura H 1977 Establishment of a human lyomyosarcoma cell line. Cancer Research 37: 658-664.
16	Ishiwata I, Nozawa S, Inoue T, Okumura H 1977 Development and characterization of established cell lines from primary and metastatic regions of human endometrial adenocarcinoma. Cancer Research 37: 1777-1785.
17	Ishiwata I, Ishiwata C, Soma M, Arai J, Ishikawa H 1984 Establishment of human endometrial adenocarcinoma cell line containing estradiol-17β and progesterone receptors. Gynecologic Oncology 17: 281-290.
18	Iwabuchi H, Nagata J, Sakunaga H, Sakamoto M, Okabe K, Nutahara Y, Satou H, Negishi Y, Suzuta T, Sugita M, et al. 1991 Estabishment and characterization of endometrial clear cell carcinoma cell line (TMCC-2). Nihon Sanka Fujinka Gakki Zasshi 43: 771-778. (Japanese)
19	Kataoka A, Kojiro M, Yakushiji M, Abe H 1991 Establishment and characterization of unique cell lines (KCC-1a and KCC-1b) from endometrial adenocarcinoma with clear cell carcinoma presenting unusual karyotypes and estrogen secretion. Cancer 67: 1588-1598.
20	Kruitwagen RFPM, Poels LG, Willemsen WNP, Croes HJE, Smeets DFCM, Beck JLM, Hanselaar AGJM, Ramaekers FCS, Rolland R, Jap PHK 1989 ETN-1, a new human endometrial carcinoma cell line producing ascites and distant metastaces in nude mice. International Journal of Cancer 43: 1098-1103.
21	Ku J-L, Park J-G 2005 Biology of SNU cell lines. Cancer Research and Treatment 37: 1-19.
22	Kuramoto H, Tamura S, Notake Y 1972 Establishment of a cell line of human endometrial adenocarcinoma in vitro. American Journal of Obstetrics and Gynecology 114: 1012-1019.
23	Kuramoto H, Hamano M, Nishida M, Taguchi A, Jobo T, Suzuki M, Osanai K 1976 Establishment of a cell line of human endometrial carcinoma originated from ascitic fluid. Acta Obstetrica et Gynaecologica Japonica 28: 1405-1406.
24	Kuramoto H, Nishida M, Morisawa T, Hamano M, Hata H, Kato Y, Ohno E, Iida T 1991 Establishment and characterization of human endometrial cancer cell lines. Annals of the New York Academy of Sciences 622: 402-421.
25	Nagendra DC, Burke J III, Maxwell GL, Risinger JI 2012 PPP2R1A mutations are common in the serous type of endometrial cancer. Molecular Carcinogenesis 51: 826-831.
26	Nishida M, Kasahara K, Kaneko M, Iwasaki H, Hayashi K 1985 Establishment of a new human endometrial adnocarcinoma cell line, Ishikawa cells, containing estrogen and progesterone receptors. Acta Obstetrica et Gynaecologica Japonica 37: 1103-1111.
27	Nishida M, Kasahara K, Oki A, Satoh T, Arai Y, Kubo T 1996 Establishment of eighteen clones of Ishikawa Cells. Human Cell 9: 109-116.
28	Nishida M 2002 The Ishikawa cells from birth to the present. Human Cell 15: 104-117.
29	Mo B, Vendrov AE, Palomino WA, DuPont BR, Apparao KBC, Lessey BA 2006 ECC-1 cells: A well differentiated steroid-responsive endometrial cell line with characteristics of luminal epithelium. Biology of Reproduction 75: 387-394.
30	Rantanen V, Grenman S, Kulama J, Salmi T, Grenman R 1992 Radiation sensitivity of endometrial carcinoma in vitro. Gynecologic Oncology 44: 217-222.
31	Rantanen V, Grenman S, Kulama J, Alanen K, Lakkala T, Grenman R 1994 Journal of Cancer Research and Clinical Oncology 120: 712-716.
32	Rantanen V, Grenman S, Kulmala J, Jaakkola M, Lakkala T, Sajantila A, Klemi P, Grenman R 1995 Characterization and radiosensitivity of UT-EC-2A and UT-EC-2B, two new radiosensitive endometrial cancer cell lines derived from a primary and metastatic tumor of the same patient. Gynecologic Oncology 56: 53-62.
33	Richardson GS, Dickersin GR, Atkins L, MacLsughlin DT, Raam S, Merk LP, Bradley FM 1984 KLE: A cell line with defective estrogen receptor derived from undifferentiated endometrial cancer. Gynecologic Oncology 17: 213-230.
34	Rubin Sc, Federici MG, Lloyd KO, Lewis JL, Hoskins WJ 1992 Characterization of a human endometrial carcinoma cell line producing intraperitoneal tumor growth in immunodeficient mice. Gynecologic Oncology 45: 273-278.
35	Satyaswaroop PG, Zaino RJ, Mortel R 1983 Human endometrial adenocarcinoma transplanted into nude mice: growth regulation by estradiol. Science 219: 58-60.
36	Schulten H-J, Wolf-Salgό J, Gründker C, Gunawan B, Füzesi L 2008 Charcterization of a newly established uterine carcinosarcoma cell line featuring the sarcomatous phenotype of the tumor in vitro. International Journal of Gynecological Cancer 18: 339-344.
37	Varughese J, Cocco E, Bellone S, de Leon M, Bellone M, Todeschini P, Schwartz PE, Rutherford TJ, Pecorelli S, Santin AD 2011 Uterine serous papillary carcinomas overexpress human trophoblast-cell-surface marker (Trop-2) and are highly sensitive to immunotherapy with hRS7, a humanized anti-Trop-2 monoclonal antibody. Cancer 117: 3163-3172.
38	Way DL, Grosso DS, Davis JR, Surwit EA, Christian CD 1983 Characterization of a new human endometrial carcinoma (RL95-2) established in tissue culture. InVitro 19: 147-158.
39	Yuan Y, Kim W-H, Han HS, Lee J-H, Park H-S, Chung J-K, Kang S-B, Park J-G 1997 Establishment and characterization of cell lines derived from uterine mixed Müllerian tumor. Gynecologic Oncology 66: 464-474.
40	Gorai I, Doi C, Minaguchi H 1993 Establishment and characterization of carcinosarcoma cell line of the human uterus. Cancer 71: 775-786.
41	Gal D, Forney JP, Dev VG, Porter JC 1982 A new humen cell line derived from a poorly differentiated endometrial adenocarcinoma. Gynecologic Oncology 13: 50-57.
42	Carter CA, Madden VJ 2000 A newly characterized humen endometrial adenocarcinoma cell line (CAC-1) differentiates in response to retinoic acid treatment. Experimental and Molecular Pathology 69: 175-191.
43	Bertoncello I, Bradley TR, Webber LM, Hodgson GS, Campbell JJ 1985 Human tumor cell lines established using clonal agar culture. Australian Journal of Experimental Biology and Medical Science 63: 241-248.
44	Kim JW, Lee CG, Choi SK, Kim JH, Kim TE, Lee JM, Rha JG, Namkoong SE 1997 Establishment and characterization of a highly tumorigenic human diploid endometrial cancer cell line. Cancer Genetics and Cytogenetics 99: 1-10.
45	Boyd JA, Rinehart CA, Walton LA, Siegal GP, Kaufman DG 1990 Ultrastructural characterization of two new human endometrial carcinoma cell lines and normal human endometrial epithelial cells cultured on extracellular matrix. Cellular and Deveopmental Biology 26: 701-708.
46	Yudate T, Isaka K, Okabe K, Takayama M 1995 Establishment and characterization of the new cell line (EI) from a human endometrial adenocarcinoma. Human Cell 8: 43-48. (in Japanese)
47	Isaka K, Nishi H, Nakada T, Osakabe Y, Hokamura M, Serizawa H, Ebihara Y, Takayama M 2002 Establishment and characterization of a new human cell line (EJ) derived from endometrial carcinoma. Huamn Cell 15: 200-206.
48	Dery M-C, Van Themsche C, Provencher D, Mes-Masson A-M, Asselin E 2007 Characterization of EN-1078D, a poorly differentiated human endometrial carcinoma cell line: a novel tool to study endometrial invasion in vitro. Reproductive Biology and Endocrinology 5:38.
49	Hashimoto H, Kojima A, Sudo T, Ohki N, Yamaguchi S, Mikami Y, Ito M, Nishimura R 2008 Establishment and characterization of a human cell line derived from a uterine papillary serous carcinoma with wild-type p53 function. Human Cell 21: 64-69.
50	Kiguchi K, Ishiwata I, Tokieda Y, Iguchi M, Ishiwata C, Ishikawa H 1999 Establishment and characterization of human poorly differentiated adenocarcinoma cell line (HHUABM). Human Cell 12: 211-217.
51	Misawa Y 1988 Establishment and characterization of three endometrial cancer cell lines from the same patient. Nihon Sanka Fujinka Gakkai Zasshi 40: 1439-1446. (in Japanese)
52	Hu Q, Yu L, Chen R, Zhang Y, Xie Y, Liao Q 2012 Characterization of LHY-821, a novel moderately differentiated endometrial carcinoma cell line. InVitro Cellular and Developmental Biology-Animal 48: 441-448.
53	Nasu K, Matsui N, Narahara H, Tanaka Y, Takai Y, Miyakawa I, Higuchi Y 1998 MaMi, a human endometrial stromal sarcoma cell line that constitutively produces interleukin-6, interleukin-8, and moncyte chemoattractant protein-1. Archives of Pathology and Laboratory Medicine 122: 836-841.
54	Faruqi SA, Satyasswaroop PG, LiVolsi VA, Deger RB, Noumoff JS 2002 Establishment and characterization of a poorly differentiated lethal human endometrial carcinoma cell line (NOU-1) with karyotype 46,XX. Cancer Genetics and Cytogenetics 138: 44-49.
55	Yasui Y 1987 Establishment and characterization of the cell line of a human endometrial carcinoma. Nihon Sanka Fujinka Gakkai Zasshi 39: 297-302.
56	Ohyama A, Nikaido T, Tachibana T, Tominaga N, Toyomura J, Kimura E, Nakahara T, Yasuda M, Ishikawa H 2015 Establishment and characterization of a cell line designated Nur=1 derived from human endometrioid adenocarcinoma of uterine corpus. Human Cell 28: 100-107.
57	Yamada T, Ueda M, Maeda T, Okamoto Y, Miyawaki Y, Otsuki Y, Ueki M, Sugimoto O 1989 Establishment and characterization of CA125 producing cell line (OMC-2) originating from a human endometrial adenocarcinoma. Asia-Oceania Journal of Obstetrics and Gynaecology 15: 403-416.
58	Ueda M, Yamada T, Okamoto Y, Misaki O, Seiki Y, Tsurunaga T, Iwai E, Fukuda Y, Ueki M, Sugimoto O 1988 Establishment and characterization of a cell line (OMC-6) originating from a human endometrial stromal sarcoma. Nihon Sanka Fujinka Gakkai Zasshi 40: 1555-1556.
59	Kakuno Y, Yamada T, Mori H, Narabayashi I 2008 Establishment and characterization of a cell line (OMC-9) originating from a human endometrial stromal sarcoma. Huamn Cell 21: 46-55.
60	Satoh T, Nishida M, Miyazaki Y, Sugita M, Arai Y, Oki A, Kono K, Tsunoda H, Kasahara K, Kubo T 1995 Establishment of a cisplatin-resistant new human endometrial adenocarcinoma cell line, Sawano cells. Human Cell 8: 67-72. (in Japanese)
61	Hirai Y, Kawaguchi T, Hasumi K, Kitagawa T, Noda T 1994 Establishment and characterization of human cell lines from a serous papillary adenocarcinoma of the endometrium. Gynecologic Oncology 54: 184-195.
62	Satoh T, Nishida M, Oki A, Tsunoda H, Kasahara K, Kubo T 1995 Establishment of a new human endometrial adenocarcinoma cell line, Watanabe cells, containing estrogen receptor. Human Cell 8: 195-201.
63	Liu X-Z, Ren Z-Z, Yu X, Sun W, Li Y-F, Rui X-M, Xie D-F, Meng X-L, Zheng Z-G 2019 Establishment and characterization of novel human primary endometrial cancer cell line (ZJB-ENC1) and its genomic characteristic. Journal of Cancer 10:6466-6474.
